# Supplementary material
Source: MDPI journal article supplement (https://www.mdpi.com/2227-9040/8/3/60)
Supplement: s1 [file s1]

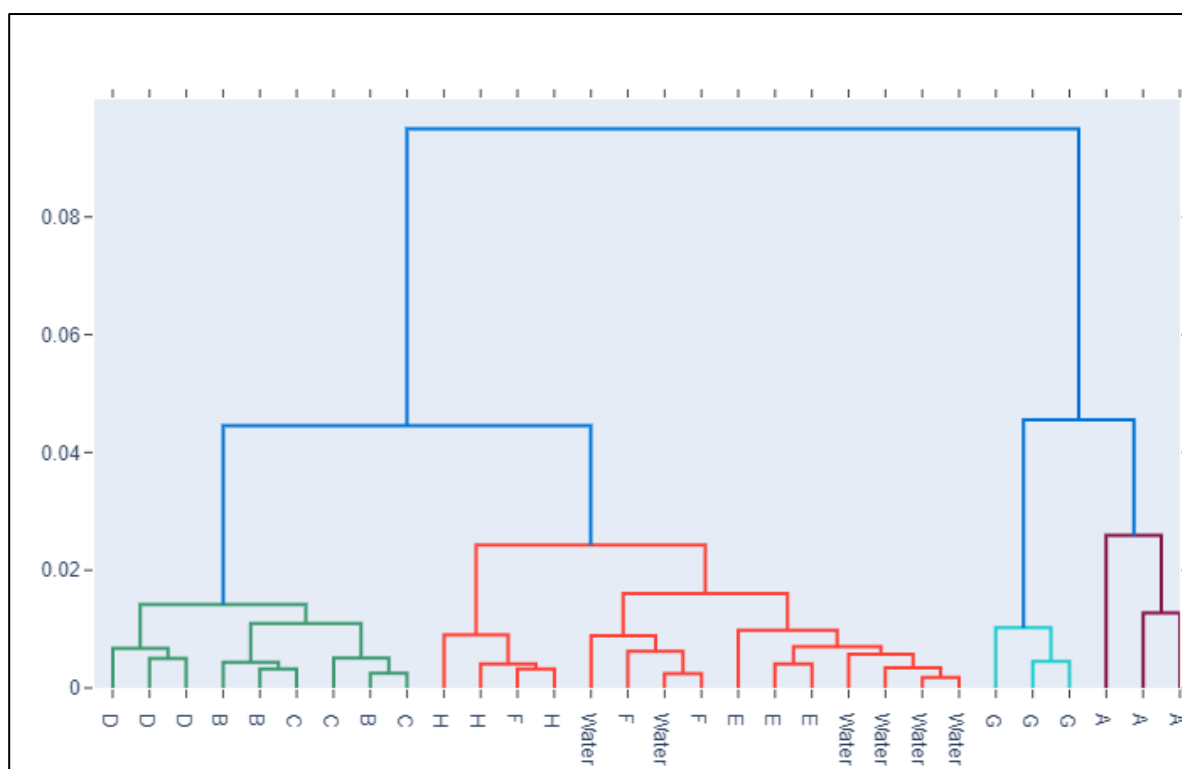

**Figure S1.** Dendrogram representation of PCA distances based on direct measurements of 9 different waters. Sample codes are available in Table 3.

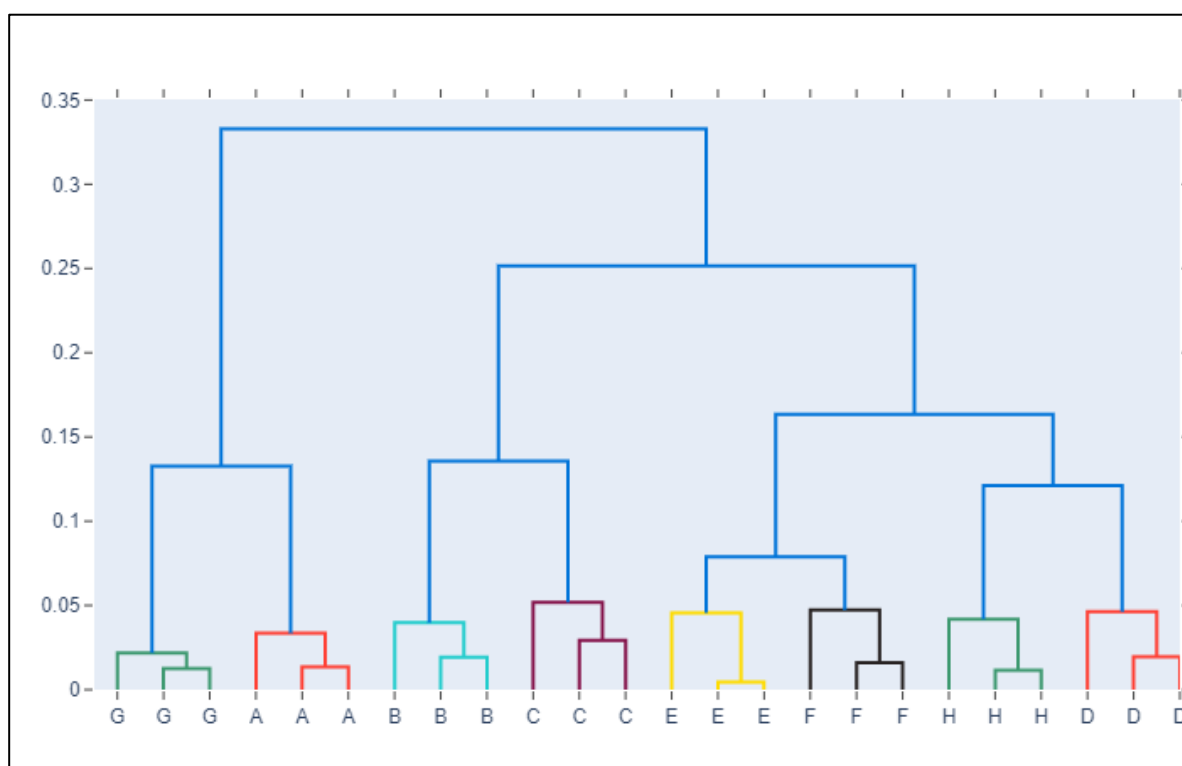

**Figure S2.** Dendrogram representation of PCA distances based on ATD measurements of 8 flavored waters. Sample codes are available in Table 3.
